# Supplementary material
Source: PubMed Central journal article supplement (PMC3087961)
Supplement: cbt1106_0567SD1.pdf [file cbt1106_0567SD1.pdf]

## Supplementary Data

**Supplementary Table 1.** Clinicopathologic features of primary colon cancer samples exhibiting higher PDRG1 mRNA levels than their matching normal tissues.

| <b>Patient #</b> | <b>Age (yrs)</b> | <b>Sex</b> | <b>Tumor Type</b>                |
|------------------|------------------|------------|----------------------------------|
| 1                | 67               | Female     | Adenocarcinoma NOS               |
| 2                | 58               | Male       | Adenocarcinoma NOS               |
| 3                | 77               | Male       | Adenocarcinoma NOS               |
| 4                | 58               | Female     | Tubulovillous adenoma            |
| 5                | 43               | Female     | Adenocarcinoma NOS               |
| 6                | 58               | Female     | Adenocarcinoma NOS               |
| 7                | 58               | Female     | Adenocarcinoma                   |
| 8                | 66               | Male       | Adenocarcinoma                   |
| 10               | 43               | Female     | Adenocarcinoma                   |
| 11               | 46               | Female     | Adenocarcinoma                   |
| 13               | 61               | Male       | Adenocarcinoma NOS               |
| 14               | 43               | Female     | Adenocarcinoma NOS               |
| 15               | 40               | Female     | Adenocarcinoma NOS<br>Metastases |
| 17               | 40               | Female     | Adenocarcinoma NOS               |
| 18               | 46               | Female     | Adenocarcinoma NOS               |
| 19               | 70               | Female     | Adenocarcinoma NOS<br>Metastases |
| 20               | 72               | Male       | Adenocarcinoma NOS               |
| 21               | 67               | Male       | Adenocarcinoma NOS<br>Metastases |
| 22               | 60               | Male       | Adenocarcinoma NOS               |
| 23               | 61               | Female     | Adenocarcinoma NOS               |
| 26               | 64               | Male       | Adenocarcinoma NOS               |
| 27               | 60               | Male       | Adenocarcinoma NOS               |
| 28               | 61               | Female     | Adenocarcinoma NOS               |
| 29               | 75               | Female     | Adenocarcinoma NOS               |
| 30               | 69               | Female     | Adenocarcinoma NOS               |
| 31               | 35               | Female     | Adenocarcinoma NOS               |
| 33               | 79               | Female     | Adenocarcinoma NOS               |
| 34               | 51               | Female     | Adenocarcinoma NOS               |
| 35               | 77               | Male       | Adenocarcinoma NOS               |
| 36               | 63               | Male       | Adenocarcinoma NOS               |
| 37               | 73               | Female     | Adenocarcinoma NOS               |
| 39               | 65               | Female     | Adenocarcinoma NOS               |

**Supplementary Table 2.** Clinicopathologic features of primary rectum cancer samples exhibiting higher PDRG1 mRNA levels than their matching normal tissues.

| <b>Patient #</b> | <b>Age (yrs)</b> | <b>Sex</b> | <b>Tumor Type</b>       |
|------------------|------------------|------------|-------------------------|
| 3                | 46               | Female     | Adenocarcinoma NOS      |
| 4                | 63               | Female     | Adenocarcinoma NOS      |
| 5                | 73               | Female     | Adenocarcinoma NOS      |
| 6                | 55               | Male       | Adenocarcinoma NOS      |
| 8                | 65               | Female     | Adenocarcinoma NOS      |
| 9                | 60               | Male       | Adenocarcinoma NOS      |
| 10               | 63               | Male       | Adenosquamous NOS       |
| 12               | 48               | Female     | Adenocarcinoma NOS      |
| 14               | 66               | Male       | Adenocarcinoma NOS      |
| 16               | -                | Male       | Adenocarcinoma NOS      |
| 17               | 59               | Male       | Adenocarcinoma NOS      |
| 18               | 64               | Male       | Adenocarcinoma NOS      |
| 20               | 49               | Female     | Adenocarcinoma NOS      |
| 21               | 59               | Female     | Adenocarcinoma NOS      |
| 22               | 53               | Female     | Mucinous adenocarcinoma |
| 23               | 70               | Female     | Adenocarcinoma NOS      |
| 24               | 42               | Male       | Adenocarcinoma NOS      |
| 25               | 71               | Female     | Adenocarcinoma NOS      |
| 26               | 59               | Female     | Adenocarcinoma NOS      |
| 27               | 43               | Male       | Adenocarcinoma NOS      |
| 28               | 44               | Female     | Mucinous adenocarcinoma |
| 29               | 68               | Male       | Adenocarcinoma NOS      |

**Supplementary Table 3.** Clinicopathologic features of primary ovary cancer samples exhibiting higher PDRG1 mRNA levels than their matching normal tissues.

| <b>Patient #</b> | <b>Age (yrs)</b> | <b>Sex</b> | <b>Tumor Type</b>                       |
|------------------|------------------|------------|-----------------------------------------|
| 2                | 38               | Female     | Mucinous borderline carcinoma           |
| 3                | 69               | Female     | Serous cystadenocarcinoma               |
| 4                | 58               | Female     | Carcinoma NOS                           |
| 5                | 72               | Female     | Clear cell adenocarcinoma NOS           |
| 6                | 57               | Female     | Adenosquamous carcinoma                 |
| 7                | 56               | Female     | Papillary serous cystadenocarcinoma NOS |
| 10               | 53               | Female     | Adenocarcinoma NOS<br>Metastases        |
| 11               | 72               | Female     | Papillary serous carcinoma              |
| 12               | 61               | Female     | Serous cystadenocarcinoma               |
| 13               | 64               | Female     | Papillary serous cystadenocarcinoma     |
| 14               | 41               | Female     | Adenocarcinoma                          |
| 16               | 53               | Female     | Leiomyoma NOS                           |
| 17               | 61               | Female     | Adenocarcinoma NOS                      |
| 18               | 38               | Female     | Clear cell adenocarcinoma NOS           |
| 19               | 55               | Female     | Adenocarcinoma NOS                      |
| 20               | 54               | Female     | Leiomyoma NOS                           |
| 21               | 63               | Female     | Mucinous cystadenocarcinoma NOS         |
| 22               | 72               | Female     | Adenocarcinoma NOS                      |

**Supplementary Table 4.** Clinicopathologic features of primary lung cancer samples exhibiting higher PPDRG1 mRNA levels than their matching normal tissues.

| <b>Patient #</b> | <b>Age (yrs)</b> | <b>Sex</b> | <b>Tumor Type</b>                               |
|------------------|------------------|------------|-------------------------------------------------|
| 1                | 66               | Male       | Squamous cell carcinoma keratinizing NOS        |
| 2                | 69               | Female     | Bronchiolo-alveolar adenocarcinoma              |
| 3                | 73               | Male       | Squamous cell carcinoma keratinizing NOS        |
| 7                | 66               | Male       | Squamous cell carcinoma NOS                     |
| 11               | 46               | Male       | Squamous cell carcinoma NOS                     |
| 13               | 65               | Female     | Squamous cell carcinoma keratinizing NOS        |
| 14               | 62               | Male       | Adenocarcinoma NOS                              |
| 15               | 59               | Female     | Adenocarcinoma                                  |
| 17               | 75               | Male       | Squamous cell carcinoma                         |
| 18               | 33               | Female     | Malignant carcinoid tumor                       |
| 19               | 62               | Male       | Squamous cell carcinoma keratinizing NOS        |
| 21               | 58               | Male       | Squamous cell carcinoma NOS                     |
| 22               | 72               | Male       | Central cancer of the right lung                |
| 23               | 66               | Male       | Central cancer of the middle lobe of right lung |
| 25               | 63               | Male       | Squamous cell carcinoma keratinizing NOS        |
| 27               | 67               | Male       | Squamous cell carcinoma NOS                     |
| 28               | 71               | Male       | Squamous cell carcinoma keratinizing NOS        |
| 29               | 65               | Male       | Adenocarcinoma NOS                              |
| 30               | 52               | Male       | Squamous cell carcinoma NOS                     |

**Supplementary Table 5.** Clinicopathologic features of primary gastric cancer samples exhibiting higher PDRG1 mRNA levels than their matching normal tissues.

| <b>Patient #</b> | <b>Age (yrs)</b> | <b>Sex</b> | <b>Tumor Type</b>  |
|------------------|------------------|------------|--------------------|
| 3                | 44               | Male       | Adenocarcinoma NOS |
| 4                | 48               | Male       | Adenocarcinoma NOS |
| 5                | 59               | Female     | Adenocarcinoma NOS |
| 7                | 53               | Male       | Adenocarcinoma NOS |
| 8                | 58               | Male       | Adenocarcinoma NOS |
| 9                | 55               | Male       | Adenocarcinoma NOS |
| 10               | 68               | Female     | Adenocarcinoma NOS |
| 11               | 61               | Male       | Adenocarcinoma NOS |
| 12               | 53               | Male       | Adenocarcinoma     |
| 14               | 73               | Female     | Adenocarcinoma     |
| 15               | 68               | Female     | Adenocarcinoma     |
| 16               | 48               | Male       | Adenocarcinoma     |
| 17               | 53               | Female     | Adenocarcinoma     |
| 18               | 61               | Male       | Adenocarcinoma NOS |
| 19               | 51               | Male       | Adenocarcinoma NOS |
| 20               | 35               | Male       | Cystadenocarcinoma |
| 25               | 65               | Male       | Adenocarcinoma NOS |
| 27               | 69               | Male       | Adenocarcinoma NOS |
| 28               | 63               | Male       | Adenocarcinoma NOS |
| 30               | 47               | Male       | Gastric cancer     |
| 31               | 65               | Male       | Adenocarcinoma     |
| 32               | 61               | Male       | Adenocarcinoma NOS |
| 34               | 72               | Female     | Adenocarcinoma NOS |
| 35               | 67               | Female     | Adenocarcinoma NOS |
| 37               | 68               | Female     | Adenocarcinoma NOS |

**Supplementary Table 6.** Clinicopathologic features of primary breast cancer samples exhibiting higher PDRG1 mRNA levels than their matching normal tissues.

| <b>Patient #</b> | <b>Age (yrs)</b> | <b>Sex</b> | <b>Tumor Type</b>                         |
|------------------|------------------|------------|-------------------------------------------|
| 1                | 39               | Female     | Noninfiltrating intraductal carcinoma NOS |
| 2                | 78               | Female     | Lobular carcinoma NOS                     |
| 3                | 49               | Female     | Infiltrating intraductal carcinoma        |
| 5                | 66               | Female     | Infiltrating intraductal carcinoma        |
| 8                | 33               | Female     | Infiltrating ductal carcinoma             |
| 9                | 40               | Female     | Infiltrating ductal carcinoma             |
| 10               | 49               | Female     | Infiltrating ductal carcinoma             |
| 16               | 50               | Female     | Infiltrating ductal carcinoma             |
| 17               | 44               | Female     | Infiltrating ductal carcinoma             |
| 18               | 52               | Female     | Infiltrating ductal carcinoma             |
| 19               | 47               | Female     | Infiltrating ductal carcinoma             |
| 20               | 59               | Female     | Infiltrating ductal carcinoma             |
| 21               | 50               | Female     | Infiltrating ductal carcinoma             |
| 23               | 63               | Female     | Tubular carcinoma                         |
| 24               | 44               | Female     | Fibrosarcoma                              |
| 25               | 49               | Female     | Infiltrating lobular carcinoma            |
| 26               | 64               | Female     | Infiltrating ductal carcinoma             |
| 27               | 50               | Female     | Infiltrating ductal carcinoma             |
| 29               | 66               | Female     | Infiltrating lobular carcinoma            |
| 31               | 61               | Female     | Infiltrating lobular carcinoma            |
| 32               | 38               | Female     | Infiltrating lobular carcinoma            |
| 33               | 58               | Female     | Infiltrating ductal carcinoma             |
| 34               | 64               | Female     | Infiltrating ductal carcinoma             |
| 35               | 47               | Female     | Tubular adenocarcinoma                    |
| 36               | 40               | Female     | Infiltrating ductal carcinoma             |
| 38               | 62               | Female     | Infiltrating ductal carcinoma             |
| 39               | 71               | Female     | Infiltrating ductal carcinoma             |
| 40               | 52               | Female     | Infiltrating ductal carcinoma             |
| 42               | 43               | Female     | Infiltrating ductal carcinoma             |
| 46               | 47               | Female     | Medullary carcinoma                       |
| 47               | 60               | Female     | Infiltrating ductal carcinoma             |
| 48               | 71               | Female     | Infiltrating ductal carcinoma             |
| 52               | 52               | Female     | Lobular carcinoma NOS                     |
| 55               | 46               | Female     | Infiltrating ductal carcinoma             |
| 56               | 45               | Female     | Infiltrating ductal carcinoma             |

**Supplementary Table 7.** Clinicopathologic features of primary uterus cancer samples exhibiting higher PDRG1 mRNA levels than their matching normal tissues.

| <b>Patient #</b> | <b>Age (yrs)</b> | <b>Sex</b> | <b>Tumor Type</b>                          |
|------------------|------------------|------------|--------------------------------------------|
| 1                | 68               | Female     | Adenocarcinoma NOS                         |
| 2                | 59               | Female     | Adenocarcinoma NOS                         |
| 3                | 68               | Female     | Adenocarcinoma with foci of epidermization |
| 4                | 58               | Female     | Poorly differentiated adenocarcinoma       |
| 5                | 60               | Female     | Squamous cell carcinoma NOS                |
| 6                | 50               | Female     | Adenocarcinoma                             |
| 7                | 75               | Female     | Adenocarcinoma NOS                         |
| 8                | 54               | Female     | Adenocarcinoma NOS                         |
| 9                | 73               | Female     | Adenocarcinoma NOS                         |
| 11               | 58               | Female     | Adenocarcinoma NOS                         |
| 12               | 61               | Female     | Adenocarcinoma NOS                         |
| 13               | 60               | Female     | Adenocarcinoma NOS                         |
| 15               | 60               | Female     | Adenocarcinoma NOS                         |
| 16               | 76               | Female     | Adenocarcinoma NOS                         |
| 18               | 41               | Female     | Adenocarcinoma NOS                         |
| 23               | 53               | Female     | Endometrial stromal sarcoma                |
| 24               | 70               | Female     | Adenocarcinoma NOS                         |
| 27               | 67               | Female     | Adenocarcinoma NOS                         |
| 28               | 66               | Female     | Adenocarcinoma NOS                         |
| 29               | 59               | Female     | Adenocarcinoma NOS                         |
| 31               | 61               | Female     | Adenocarcinoma NOS                         |
| 32               | 52               | Female     | Adenocarcinoma NOS                         |
| 35               | 77               | Female     | Malignant mixed mullerian tumor            |
| 36               | 46               | Female     | Keratinizing squamous cell carcinoma NOS   |
| 41               | 72               | Female     | Adenocarcinoma NOS                         |
| 42               | 42               | Female     | Squamous cell carcinoma                    |
| 43               | 46               | Female     | Keratinizing squamous cell carcinoma NOS   |
| 44               | 43               | Female     | Adenocarcinoma NOS                         |
| 46               | 71               | Female     | Adenocarcinoma NOS                         |
